# Supplementary material for: Single-Cell RNA Sequencing Reveals Tumor Microenvironment Remodeling after Neoadjuvant Immunotherapy in Non-small Cell Lung Cancer
Source: Research Square preprint supplement (doi:10.21203/rs.3.rs-934132/v1), 2021-10-07
Supplement: Supplementary file 1 [file f4774aa2c14e98098b4a8680.xlsx]

## Sheet: 1.Marker genes of neutrophils
Marker genes for neutrophil clusters
p_val	avg_logFC	pct.1	pct.2	p_val_adj	cluster	gene
7.41568e-274	0.748926	0.939	0.725	1.80142e-269	0	C5AR1
3.00839e-270	0.401231	1	1	7.30799e-266	0	MT-RNR2
8.87719e-264	0.597372	0.939	0.673	2.15645e-259	0	CXCR2
2.10717e-260	0.683228	0.928	0.701	5.11873e-256	0	RGS2
1.30855e-249	0.945786	0.682	0.346	3.17873e-245	0	PTGS2
4.57446e-224	0.579546	0.928	0.668	1.11123e-219	0	MNDA
1.01787e-199	0.572678	0.892	0.668	2.47261e-195	0	BASP1
7.89423e-177	0.652932	0.886	0.744	1.91767e-172	0	BTG2
4.82818e-175	0.670229	0.657	0.362	1.17286e-170	0	RNASET2
1.8532e-169	0.36682	0.999	0.981	4.50179e-165	0	ACTB
2.99276e-153	0.482171	0.84	0.578	7.27001e-149	0	ARHGDIB
7.2264e-141	0.572478	0.613	0.332	1.75544e-136	0	JAML
1.19042e-133	0.348903	0.985	0.962	2.89177e-129	0	MT-RNR1
2.93792e-130	0.787337	0.467	0.228	7.1368e-126	0	PROK2
1.39249e-128	0.460024	0.833	0.626	3.38264e-124	0	ZYX
7.34466e-121	0.443243	0.793	0.542	1.78416e-116	0	CXCR1
1.09708e-112	0.40564	0.725	0.444	2.66504e-108	0	VNN2
2.81638e-106	0.299474	0.987	0.951	6.84155e-102	0	JUNB
1.82279e-102	0.427483	0.801	0.614	4.42792e-98	0	TAGLN2
2.27199e-100	0.360126	0.868	0.699	5.51912e-96	0	CNN2
3.11608e-100	0.509647	0.498	0.265	7.56959e-96	0	ALPL
7.43932e-94	0.605714	0.449	0.244	1.80716e-89	0	TUBA1A
1.48575e-93	0.542918	0.489	0.275	3.60919e-89	0	CPPED1
3.13307e-91	0.295489	0.936	0.819	7.61085e-87	0	SPI1
6.14028e-89	0.296148	0.896	0.678	1.4916e-84	0	RIPOR2
2.37909e-84	0.32738	0.831	0.637	5.77928e-80	0	FAM129A
4.14848e-83	0.253827	0.988	0.963	1.00775e-78	0	S100A11
1.00082e-81	0.361034	0.916	0.856	2.4312e-77	0	G0S2
1.1922e-81	0.633154	0.509	0.318	2.89609e-77	0	IL1B
8.82299e-80	0.502049	0.654	0.486	2.14328e-75	0	FOSB
3.05741e-78	0.347183	0.782	0.602	7.42707e-74	0	VMP1
2.46615e-77	0.565785	0.257	0.107	5.99078e-73	0	RUBCNL
7.37316e-77	0.472255	0.502	0.304	1.79109e-72	0	PECAM1
2.66068e-76	0.510098	0.793	0.668	6.46331e-72	0	ACTG1
7.34188e-76	0.380279	0.52	0.302	1.78349e-71	0	MME
2.14292e-75	0.261761	0.955	0.876	5.20558e-71	0	MCL1
2.17874e-67	0.484093	0.583	0.4	5.29259e-63	0	HSPA1A
3.024e-64	0.254542	0.851	0.671	7.34591e-60	0	GCA
1.05452e-62	0.354081	0.573	0.372	2.56164e-58	0	CORO1A
2.05236e-62	0.651214	0.33	0.184	4.98558e-58	0	MID1IP1
1.96377e-61	0.504905	0.52	0.357	4.77039e-57	0	OSM
7.14711e-60	0.429419	0.59	0.424	1.73618e-55	0	YPEL5
2.6928e-57	0.291801	0.762	0.577	6.54135e-53	0	SORL1
2.74524e-56	0.261875	0.859	0.719	6.66874e-52	0	YPEL3
7.44176e-56	0.330815	0.673	0.497	1.80775e-51	0	R3HDM4
2.04371e-55	0.303673	0.703	0.52	4.96457e-51	0	XPO6
1.80916e-54	0.348492	0.423	0.252	4.39481e-50	0	CDA
7.85804e-54	0.368433	0.327	0.183	1.90888e-49	0	HSPA1B
9.56068e-54	0.552628	0.312	0.175	2.32248e-49	0	PFKFB3
1.28779e-53	0.324876	0.553	0.368	3.1283e-49	0	CMTM2
2.02928e-53	0.378747	0.336	0.187	4.92952e-49	0	RGS18
3.89732e-52	0.3707	0.457	0.29	9.46738e-48	0	CREB5
1.18896e-51	0.493895	0.314	0.177	2.88823e-47	0	SYAP1
8.09281e-51	0.350598	0.553	0.387	1.9659e-46	0	ADAM8
2.16495e-50	0.39287	0.309	0.17	5.2591e-46	0	PIK3CD
5.36933e-49	0.321103	0.623	0.46	1.30432e-44	0	COTL1
7.35856e-49	0.378747	0.534	0.373	1.78754e-44	0	MYADM
1.10533e-48	0.387752	0.448	0.292	2.68507e-44	0	RAB11FIP1
4.67991e-48	0.34843	0.388	0.235	1.13684e-43	0	MMP25
1.00405e-47	0.28953	0.607	0.436	2.43904e-43	0	ACTN1
3.87113e-47	0.378489	0.314	0.177	9.40374e-43	0	TNFRSF10C
1.40519e-46	0.29836	0.445	0.278	3.41348e-42	0	USP10
1.4939e-46	0.303319	0.414	0.27	3.62897e-42	0	DNAJB1
1.93832e-46	0.467223	0.426	0.281	4.70857e-42	0	NCOA4
2.02164e-46	0.338819	0.448	0.286	4.91098e-42	0	ICAM3
1.09699e-45	0.395112	0.394	0.248	2.6648e-41	0	PTPRE
1.3318e-45	0.31994	0.695	0.553	3.2352e-41	0	BTG1
2.11671e-45	0.376648	0.385	0.242	5.1419e-41	0	NRBF2
2.5351e-45	0.359008	0.418	0.264	6.15825e-41	0	ERGIC1
1.10287e-44	0.460535	0.289	0.166	2.6791e-40	0	EGR3
1.58857e-43	0.323836	0.594	0.481	3.85896e-39	0	HSP90AA1
4.30216e-43	0.346719	0.465	0.317	1.04508e-38	0	FLOT2
1.73947e-42	0.403704	0.272	0.153	4.22552e-38	0	EGLN1
2.95367e-42	0.39159	0.396	0.257	7.17507e-38	0	TPM4
4.99077e-42	0.461406	0.702	0.644	1.21236e-37	0	PLAUR
4.82489e-41	0.324784	0.441	0.29	1.17206e-36	0	PXN
3.08954e-40	0.269322	0.841	0.727	7.50512e-36	0	ZFP36L1
1.94993e-39	0.314683	0.487	0.336	4.73678e-35	0	APBB1IP
2.00881e-39	0.297243	0.542	0.392	4.8798e-35	0	LRRFIP1
2.05872e-39	0.282833	0.668	0.522	5.00104e-35	0	MYO1F
2.59542e-39	0.389995	0.426	0.295	6.3048e-35	0	CSRNP1
3.38257e-39	0.287767	0.704	0.586	8.21693e-35	0	KDM6B
4.92454e-39	0.325339	0.386	0.245	1.19627e-34	0	SLC44A2
2.26479e-38	0.459071	0.334	0.215	5.50163e-34	0	IFRD1
5.36038e-37	0.351437	0.257	0.147	1.30214e-32	0	ASAP1
5.71017e-37	0.264763	0.598	0.448	1.38712e-32	0	LRP10
7.88072e-37	0.333649	0.367	0.238	1.91438e-32	0	STAT5B
1.954e-36	0.276607	0.714	0.583	4.74666e-32	0	IER2
1.09842e-35	0.36668	0.48	0.356	2.66829e-31	0	NFKBIZ
2.17776e-35	0.300783	0.528	0.39	5.29023e-31	0	ARHGAP9
6.53347e-35	0.315473	0.422	0.288	1.58711e-30	0	RASSF3
8.45444e-35	0.342626	0.392	0.266	2.05375e-30	0	FAM53C
1.5851e-34	0.283589	0.496	0.358	3.85054e-30	0	IL6R
3.05069e-34	0.312804	0.427	0.298	7.41075e-30	0	MBP
3.17689e-34	0.30547	0.641	0.525	7.71731e-30	0	UBC
3.66405e-34	0.275793	0.52	0.377	8.9007e-30	0	STEAP4
1.07519e-33	0.252004	0.574	0.428	2.61186e-29	0	MSL1
1.30553e-33	0.284403	0.373	0.244	3.17138e-29	0	SELPLG
2.39871e-33	0.287124	0.611	0.462	5.82695e-29	0	KLF2
2.79057e-33	0.270538	0.473	0.33	6.77885e-29	0	TLE3
3.10566e-33	0.327272	0.361	0.241	7.54428e-29	0	JMJD1C
1.26486e-32	0.319292	0.434	0.308	3.07261e-28	0	MIDN
2.10477e-31	0.294236	0.45	0.321	5.11292e-27	0	GRK2
6.38871e-30	0.296625	0.284	0.177	1.55195e-25	0	TMX4
1.40663e-29	0.251013	0.371	0.247	3.41698e-25	0	DYSF
1.98051e-29	0.295013	0.421	0.295	4.81106e-25	0	FRAT2
2.78153e-29	0.299769	0.252	0.153	6.75688e-25	0	TMEM71
3.38688e-29	0.336889	0.257	0.157	8.22741e-25	0	ARHGEF40
5.94919e-29	0.306578	0.377	0.26	1.44518e-24	0	NDEL1
1.30516e-27	0.294208	0.298	0.199	3.17049e-23	0	HSP90AB1
2.38196e-27	0.318052	0.26	0.163	5.78625e-23	0	GLT1D1
3.975e-27	0.309627	0.267	0.168	9.65608e-23	0	FAM126B
2.92446e-26	0.274611	0.399	0.284	7.1041e-22	0	RAB31
6.34221e-26	0.288012	0.27	0.174	1.54065e-21	0	CTDSP2
1.40671e-25	0.30118	0.327	0.223	3.41719e-21	0	FGL2
2.1464e-25	0.276312	0.269	0.171	5.21403e-21	0	GNAQ
3.04061e-25	0.268582	0.323	0.218	7.38624e-21	0	CDKN2D
4.71763e-25	0.255961	0.51	0.398	1.14601e-20	0	IGF2R
1.44482e-24	0.260198	0.511	0.396	3.50975e-20	0	UBE2R2
2.27555e-24	0.280459	0.507	0.394	5.52777e-20	0	TRIB1
3.3009e-24	0.274082	0.338	0.233	8.01854e-20	0	OAZ2
5.50034e-24	0.263382	0.326	0.222	1.33614e-19	0	PBX2
1.75713e-22	0.307272	0.251	0.165	4.26843e-18	0	TPR
1.86945e-22	0.269584	0.278	0.187	4.54128e-18	0	NCOA1
2.54511e-20	0.261596	0.31	0.219	6.18258e-16	0	ABHD2
4.16682e-20	0.283028	0.292	0.205	1.0122e-15	0	FKBP8
1.40352e-18	0.332624	0.314	0.229	3.40943e-14	0	AC023157.3
5.01341e-15	0.250877	0.459	0.381	1.21786e-10	0	NFE2L2
0	2.09676	0.411	0.079	0	1	CCL3
0	1.969	0.612	0.144	0	1	CCL4L2
0	1.76701	0.558	0.095	0	1	C15orf48
0	1.56695	0.395	0.069	0	1	CD83
0	1.44969	0.606	0.145	0	1	CCRL2
0	0.986058	0.913	0.616	0	1	CXCR4
0	0.985006	0.963	0.653	0	1	CXCL8
0	0.356352	1	1	0	1	B2M
1.23694e-300	1.83468	0.451	0.121	3.00477e-296	1	CCL4
1.62688e-299	1.15355	0.574	0.204	3.95201e-295	1	CYBB
1.69305e-276	1.14905	0.483	0.143	4.11277e-272	1	CDKN1A
7.82334e-252	1.07122	0.568	0.235	1.90044e-247	1	SQSTM1
9.78064e-251	0.727832	0.912	0.746	2.37591e-246	1	FCER1G
1.18614e-247	0.439965	1	0.999	2.88137e-243	1	FTH1
1.18562e-242	1.0171	0.489	0.166	2.8801e-238	1	BHLHE40
2.90689e-213	1.80245	0.385	0.118	7.06141e-209	1	PI3
3.37934e-212	1.16468	0.612	0.309	8.2091e-208	1	HLA-DRA
1.7199e-186	1.04282	0.289	0.07	4.17797e-182	1	M6PR
4.36495e-180	0.932935	0.53	0.248	1.06033e-175	1	NBN
4.79429e-173	0.831351	0.804	0.579	1.16463e-168	1	CD74
1.18024e-170	0.328442	0.999	0.997	2.86705e-166	1	HLA-B
9.43378e-156	0.730042	0.66	0.375	2.29165e-151	1	TNFAIP3
1.13492e-154	1.19129	0.269	0.073	2.75694e-150	1	VEGFA
2.32634e-152	0.904221	0.312	0.098	5.65114e-148	1	LIMS1
1.11454e-144	0.626548	0.657	0.383	2.70745e-140	1	GRINA
2.76245e-139	0.77209	0.472	0.228	6.71054e-135	1	TPP1
2.04792e-137	0.906261	0.277	0.084	4.97482e-133	1	C3AR1
1.23858e-135	0.868376	0.458	0.221	3.00875e-131	1	PTMA
1.11054e-132	0.703043	0.53	0.27	2.69772e-128	1	PPIF
9.81595e-132	0.858496	0.424	0.198	2.38449e-127	1	MGAT1
1.05624e-128	0.688969	0.866	0.729	2.56583e-124	1	NFKBIA
8.23694e-128	0.655995	0.721	0.523	2.00092e-123	1	TNFAIP2
8.11298e-122	0.263986	0.998	0.997	1.9708e-117	1	HLA-A
4.21139e-120	0.578089	0.779	0.623	1.02303e-115	1	BRI3
8.66209e-120	0.581871	0.624	0.36	2.10419e-115	1	GBP5
8.95176e-120	0.92108	0.458	0.246	2.17456e-115	1	CTSD
8.97776e-119	0.771269	0.36	0.15	2.18088e-114	1	CTSC
2.83524e-118	0.716379	0.447	0.221	6.88737e-114	1	ICAM1
2.18521e-114	0.637803	0.468	0.225	5.30832e-110	1	GBP4
6.4268e-113	0.951414	0.333	0.137	1.5612e-108	1	DUSP2
6.14134e-109	0.710966	0.709	0.509	1.49185e-104	1	IER3
7.08757e-108	0.758777	0.29	0.11	1.72171e-103	1	CANX
1.7002e-106	1.21199	0.277	0.103	4.13012e-102	1	SLPI
5.62909e-105	0.696234	0.27	0.096	1.36742e-100	1	SPINT2
9.73849e-105	0.671356	0.371	0.17	2.36567e-100	1	RAB20
1.21426e-103	0.419344	0.843	0.713	2.94967e-99	1	CD53
5.2737e-103	0.797973	0.34	0.151	1.28109e-98	1	PLEKHB2
6.51265e-103	0.67672	0.388	0.182	1.58205e-98	1	PAG1
1.19479e-102	0.575245	0.654	0.44	2.90238e-98	1	CXCL16
7.32806e-102	0.844821	0.379	0.189	1.78013e-97	1	TPI1
9.2708e-99	0.784808	0.478	0.277	2.25206e-94	1	TNFAIP6
6.32818e-97	0.710135	0.257	0.094	1.53724e-92	1	IER5
1.14644e-95	0.752223	0.363	0.176	2.78493e-91	1	ENO1
1.86029e-93	0.736757	0.491	0.294	4.51902e-89	1	PHACTR1
7.30728e-93	0.862896	0.253	0.095	1.77509e-88	1	SIGLEC10
2.43291e-92	0.635926	0.389	0.198	5.91002e-88	1	ATP6V1G1
5.56066e-92	0.714547	0.265	0.103	1.3508e-87	1	MARCKSL1
1.26289e-88	0.534478	0.553	0.359	3.06782e-84	1	NINJ1
8.27227e-83	0.267624	1	0.999	2.0095e-78	1	MALAT1
9.88172e-81	0.781784	0.29	0.13	2.40047e-76	1	JUN
1.02368e-78	0.704272	0.549	0.398	2.48674e-74	1	ASAH1
4.97393e-78	0.695652	0.289	0.133	1.20827e-73	1	PKM
5.92008e-74	0.44167	0.656	0.483	1.4381e-69	1	IL2RG
1.24694e-73	0.754489	0.263	0.118	3.02906e-69	1	GADD45B
9.25871e-73	0.686596	0.326	0.166	2.24913e-68	1	SGK1
9.65135e-72	0.594992	0.524	0.357	2.34451e-67	1	CD63
2.1502e-71	0.556851	0.463	0.285	5.22326e-67	1	ANKRD12
1.11641e-70	0.664816	0.322	0.168	2.71198e-66	1	MAFF
9.04507e-69	0.411863	0.955	0.935	2.19723e-64	1	SOD2
6.00649e-68	0.65826	0.264	0.119	1.4591e-63	1	SERPINB9
3.14356e-67	0.412136	0.829	0.748	7.63634e-63	1	PNRC1
6.50407e-67	0.461816	0.436	0.255	1.57997e-62	1	CCR1
2.95789e-64	0.528379	0.414	0.249	7.1853e-60	1	NPC2
3.35173e-64	0.507301	0.564	0.405	8.14203e-60	1	WSB1
5.26554e-64	0.51215	0.318	0.165	1.27911e-59	1	PIM3
5.41686e-59	0.518606	0.333	0.187	1.31586e-54	1	ATP6V1E1
6.95392e-59	0.600383	0.286	0.147	1.68925e-54	1	PIM1
6.61068e-58	0.550509	0.327	0.182	1.60587e-53	1	ABCA1
7.39266e-58	0.509812	0.534	0.367	1.79583e-53	1	GBP1
5.42753e-57	0.661718	0.292	0.155	1.31846e-52	1	CREM
1.11906e-55	0.474706	0.409	0.257	2.71843e-51	1	RPS16
1.66834e-55	0.556699	0.449	0.297	4.05272e-51	1	CD14
3.06429e-54	0.529117	0.336	0.194	7.44376e-50	1	RBM25
5.68426e-54	0.412033	0.49	0.331	1.38082e-49	1	GK
1.02876e-52	0.509281	0.262	0.134	2.49905e-48	1	HNRNPF
3.40281e-52	0.615907	0.259	0.135	8.26611e-48	1	DDX21
4.16798e-52	0.439325	0.464	0.316	1.01249e-47	1	RPS27A
6.54418e-52	0.589741	0.517	0.386	1.58971e-47	1	MARCKS
5.26624e-51	0.525999	0.432	0.29	1.27927e-46	1	CD44
1.54563e-50	0.343696	0.654	0.513	3.75464e-46	1	SMIM25
5.83359e-50	0.437271	0.461	0.312	1.41709e-45	1	SKIL
7.30057e-50	0.507889	0.297	0.167	1.77345e-45	1	RPL32
1.82191e-49	0.498798	0.288	0.16	4.42579e-45	1	TANK
2.37093e-49	0.314309	0.848	0.769	5.75945e-45	1	EIF1
1.06459e-48	0.502	0.354	0.219	2.58611e-44	1	WTAP
5.84825e-48	0.431794	0.414	0.273	1.42066e-43	1	RAB5C
2.45033e-47	0.472118	0.375	0.234	5.95234e-43	1	TMSB10
2.63543e-46	0.341475	0.66	0.53	6.40199e-42	1	TAP1
6.65266e-46	0.359458	0.697	0.605	1.61607e-41	1	ATP6V1B2
3.70904e-45	0.489586	0.253	0.136	9.01e-41	1	ATP6AP1
4.66402e-45	0.423675	0.296	0.169	1.13298e-40	1	RPL9
2.14402e-44	0.366925	0.532	0.388	5.20826e-40	1	PLSCR1
3.26437e-43	0.452024	0.362	0.23	7.92982e-39	1	ARL6IP5
5.76168e-43	0.445683	0.36	0.233	1.39963e-38	1	FUS
1.62096e-42	0.391087	0.489	0.353	3.93764e-38	1	STAT1
2.97036e-42	0.356504	0.408	0.264	7.21561e-38	1	UBE2L6
1.61018e-41	0.419584	0.323	0.198	3.91145e-37	1	TMBIM1
4.129e-41	0.396361	0.397	0.264	1.00302e-36	1	PITPNA
2.12923e-40	0.471333	0.285	0.166	5.17233e-36	1	BRD2
6.73546e-40	0.417881	0.369	0.241	1.63618e-35	1	FNDC3B
7.58028e-40	0.414117	0.458	0.334	1.8414e-35	1	RILPL2
5.53831e-39	0.515568	0.256	0.146	1.34537e-34	1	ARL5B
1.83683e-38	0.397925	0.489	0.365	4.46203e-34	1	HIF1A
1.88994e-38	0.394923	0.381	0.258	4.59104e-34	1	PIK3R5
5.45497e-37	0.383366	0.314	0.193	1.32512e-32	1	SERPING1
8.0968e-37	0.368912	0.353	0.228	1.96687e-32	1	TAP2
2.0059e-35	0.392275	0.43	0.313	4.87274e-31	1	RNF13
8.80528e-35	0.365523	0.34	0.222	2.13898e-30	1	CHMP4B
1.31291e-34	0.391876	0.315	0.203	3.18932e-30	1	CD164
1.75201e-34	0.377132	0.384	0.266	4.25597e-30	1	RPL23
5.79476e-34	0.400246	0.258	0.152	1.40766e-29	1	ZEB2
7.16914e-33	0.454087	0.263	0.163	1.74153e-28	1	TNIP1
1.23317e-32	0.34289	0.582	0.484	2.99562e-28	1	SNX10
1.28774e-32	0.303436	0.412	0.28	3.12817e-28	1	PARP14
4.51245e-32	0.317759	0.616	0.515	1.09617e-27	1	TNFRSF1B
2.23706e-30	0.344512	0.41	0.302	5.43427e-26	1	ABCG1
7.19142e-30	0.330967	0.365	0.26	1.74694e-25	1	FTH1P10
8.15849e-30	0.388918	0.309	0.208	1.98186e-25	1	CD300A
1.22314e-29	0.41321	0.678	0.619	2.97125e-25	1	PPP1R15A
1.98642e-29	0.330025	0.38	0.27	4.82541e-25	1	PTPN12
2.18464e-29	0.341302	0.54	0.439	5.30692e-25	1	LCP2
2.28294e-29	0.382702	0.283	0.184	5.54571e-25	1	GNS
3.20167e-29	0.327163	0.406	0.296	7.77748e-25	1	PTP4A2
1.77031e-28	0.417827	0.357	0.262	4.30045e-24	1	LAMP1
1.86481e-28	0.340081	0.289	0.189	4.52999e-24	1	RPL21
2.68003e-28	0.363814	0.34	0.236	6.51032e-24	1	PIK3AP1
4.27693e-28	0.270824	0.537	0.425	1.03895e-23	1	FLOT1
6.72433e-28	0.315669	0.432	0.322	1.63348e-23	1	RPS29
1.65651e-27	0.372264	0.286	0.188	4.02399e-23	1	RHOQ
1.14915e-26	0.383838	0.291	0.195	2.79151e-22	1	ZNF267
1.32269e-26	0.345314	0.258	0.16	3.21307e-22	1	ANKRD22
2.10071e-26	0.343594	0.362	0.261	5.10303e-22	1	CD82
3.25398e-26	0.324667	0.363	0.261	7.90456e-22	1	SRRM2
3.39951e-26	0.294419	0.3	0.199	8.25808e-22	1	TMEM123
1.46366e-25	0.329011	0.818	0.796	3.55553e-21	1	PSAP
2.01118e-24	0.270632	0.689	0.632	4.88556e-20	1	IGSF6
3.20633e-24	0.382581	0.318	0.226	7.78883e-20	1	GPR65
7.33072e-24	0.269344	0.636	0.571	1.78078e-19	1	PCBP1
4.3055e-23	0.266781	0.545	0.465	1.04589e-18	1	HNRNPC
7.25304e-23	0.343031	0.322	0.23	1.76191e-18	1	ADGRE2
2.08589e-22	0.302122	0.332	0.239	5.06705e-18	1	MAP7D1
2.19194e-22	0.294215	0.254	0.169	5.32466e-18	1	RAB5A
3.07545e-22	0.285967	0.501	0.416	7.47088e-18	1	HLA-F
8.92766e-22	0.272661	0.443	0.343	2.16871e-17	1	EEF1A1
1.72644e-21	0.443217	0.268	0.187	4.19386e-17	1	KATNBL1
2.31268e-21	0.281484	0.82	0.827	5.61797e-17	1	ALOX5AP
1.20798e-20	0.41738	0.291	0.211	2.93444e-16	1	BNIP3L
4.87586e-20	0.279204	0.564	0.489	1.18444e-15	1	PABPC1
3.19273e-19	0.258436	0.43	0.341	7.75578e-15	1	TAPBP
1.26433e-18	0.288458	0.349	0.267	3.0713e-14	1	PSME1
2.04644e-18	0.306888	0.296	0.213	4.97121e-14	1	PNISR
5.23117e-18	0.257338	0.78	0.757	1.27075e-13	1	BCL2A1
6.1222e-18	0.301064	0.26	0.185	1.48721e-13	1	DDX39B
2.36511e-17	0.287645	0.259	0.184	5.74532e-13	1	F11R
4.84561e-17	0.391203	0.327	0.254	1.1771e-12	1	CSTB
1.48588e-16	0.272117	0.261	0.189	3.60951e-12	1	KIF5B
2.09113e-16	0.331148	0.527	0.476	5.07977e-12	1	GRN
6.30285e-16	0.26364	0.366	0.29	1.53109e-11	1	PRRC2C
1.2402e-15	0.252059	0.262	0.191	3.01269e-11	1	GNA13
1.27537e-14	0.302615	0.291	0.224	3.09813e-10	1	GABARAPL2
2.86943e-14	0.283922	0.423	0.362	6.97043e-10	1	MAP1LC3B
3.05376e-14	0.251681	0.279	0.21	7.41818e-10	1	RPS11
3.46536e-14	0.278899	0.307	0.243	8.41804e-10	1	CSDE1
3.91573e-14	0.268411	0.333	0.267	9.51209e-10	1	RAB1A
4.54554e-14	0.272265	0.268	0.2	1.1042e-09	1	CHD2
7.6463e-14	0.261603	0.256	0.192	1.85744e-09	1	ARHGDIA
6.96492e-13	0.26573	0.27	0.206	1.69192e-08	1	TMEM140
4.02702e-11	0.254513	0.379	0.323	9.78243e-07	1	CIR1
1.65109e-09	0.269426	0.446	0.406	4.01082e-05	1	PGK1
0.000230805	0.657671	0.331	0.326	1	1	IL1RN
0.00024665	0.276028	0.531	0.509	1	1	EGR1
0	1.55095	0.374	0.064	0	2	RSAD2
0	1.4894	0.856	0.352	0	2	IFIT3
0	1.41027	0.734	0.331	0	2	IFIT2
0	1.38117	0.513	0.135	0	2	MX1
0	1.15987	0.764	0.336	0	2	GBP5
0	0.961809	0.97	0.804	0	2	IFITM3
4.52894e-281	1.12466	0.783	0.423	1.10017e-276	2	IFI6
8.37842e-274	1.3733	0.327	0.055	2.03528e-269	2	IFIT1
4.00112e-268	1.00701	0.614	0.233	9.71952e-264	2	PARP14
7.52363e-262	1.18007	0.334	0.061	1.82764e-257	2	HERC5
6.86336e-253	0.947368	0.713	0.328	1.66725e-248	2	GBP1
4.33485e-245	1.39023	0.445	0.13	1.05302e-240	2	ISG15
9.74198e-245	0.972319	0.571	0.212	2.36652e-240	2	SAMD9L
1.74064e-241	0.935117	0.654	0.297	4.22835e-237	2	TRIM22
9.11115e-241	1.09249	0.491	0.157	2.21328e-236	2	XAF1
3.61032e-238	1.01257	0.568	0.211	8.77019e-234	2	GBP4
4.54377e-204	0.742988	0.796	0.501	1.10377e-199	2	TAP1
4.83301e-203	0.977218	0.457	0.158	1.17404e-198	2	IRF7
3.0369e-194	0.851995	0.596	0.273	7.37723e-190	2	RNF213
5.36741e-186	0.816624	0.552	0.233	1.30385e-181	2	UBE2L6
8.02684e-175	0.992918	0.271	0.06	1.94988e-170	2	OAS3
5.3247e-169	0.832456	0.458	0.172	1.29348e-164	2	APOL6
1.73422e-168	0.967152	0.521	0.238	4.21278e-164	2	TNFSF13B
2.37178e-165	0.938028	0.328	0.095	5.76154e-161	2	DDX58
3.88365e-163	0.855932	0.328	0.094	9.43415e-159	2	PML
8.61894e-150	0.823598	0.412	0.156	2.09371e-145	2	SAMHD1
6.15031e-148	0.653528	0.627	0.323	1.49403e-143	2	STAT1
1.70212e-146	0.657586	0.716	0.454	4.13479e-142	2	GBP2
1.73056e-145	0.717898	0.575	0.296	4.20387e-141	2	PARP9
3.14265e-134	0.900197	0.365	0.137	7.63412e-130	2	ANKRD22
6.50073e-132	0.794974	0.415	0.172	1.57916e-127	2	SERPING1
8.64502e-131	0.848777	0.28	0.083	2.10005e-126	2	P2RY14
4.21809e-130	0.808814	0.379	0.147	1.02466e-125	2	XRN1
1.8077e-129	0.63121	0.665	0.407	4.39125e-125	2	SECTM1
2.95751e-127	0.432152	0.982	0.938	7.18438e-123	2	SAT1
1.09379e-124	0.756093	0.45	0.209	2.65704e-120	2	ISG20
3.61681e-113	0.698323	0.259	0.079	8.78595e-109	2	STAT2
9.02972e-112	0.544817	0.782	0.577	2.1935e-107	2	IRF1
1.98976e-110	0.732129	0.32	0.119	4.83352e-106	2	IFIH1
4.36411e-104	0.674405	0.38	0.166	1.06013e-99	2	NUB1
8.92569e-104	0.566016	0.663	0.43	2.16823e-99	2	IFI16
6.48689e-101	0.410995	0.94	0.835	1.5758e-96	2	SLC25A37
1.13739e-98	0.385477	0.947	0.85	2.76294e-94	2	FYB1
1.96314e-98	0.722888	0.291	0.109	4.76886e-94	2	EPSTI1
4.25797e-96	0.51454	0.72	0.522	1.03435e-91	2	SP110
1.19199e-95	0.620375	0.6	0.384	2.89559e-91	2	MX2
4.39379e-88	0.30305	0.988	0.949	1.06734e-83	2	CSF3R
4.58612e-85	0.494086	0.687	0.485	1.11406e-80	2	SHISA5
8.96209e-85	0.536132	0.592	0.38	2.17707e-80	2	PLSCR1
1.06752e-83	0.566714	0.54	0.326	2.59323e-79	2	GK
1.12933e-83	0.572193	0.512	0.306	2.74338e-79	2	PSMB9
5.12245e-83	0.672097	0.375	0.184	1.24435e-78	2	TMEM123
1.53544e-78	0.589708	0.479	0.281	3.7299e-74	2	GIMAP4
7.93127e-78	0.607847	0.261	0.105	1.92666e-73	2	IFITM1
4.28364e-76	0.619599	0.29	0.125	1.04058e-71	2	PHF11
1.98886e-74	0.613246	0.331	0.159	4.83133e-70	2	NUCB1
8.35597e-72	0.614605	0.363	0.186	2.02983e-67	2	SAMD9
6.30806e-71	0.616238	0.405	0.225	1.53235e-66	2	LPCAT2
2.5217e-69	0.615097	0.365	0.188	6.12572e-65	2	ZC3HAV1
5.70222e-65	0.568594	0.264	0.115	1.38518e-60	2	PSTPIP2
7.67107e-60	0.511926	0.395	0.224	1.86346e-55	2	TAP2
1.11813e-59	0.400698	0.635	0.457	2.71617e-55	2	CXCL16
1.30069e-59	0.54295	0.269	0.125	3.15963e-55	2	FAS
6.41535e-56	0.444592	0.568	0.397	1.55842e-51	2	ADAR
1.19159e-55	0.397812	0.667	0.517	2.8946e-51	2	SMIM25
2.08873e-55	0.565071	0.309	0.163	5.07394e-51	2	EIF2AK2
6.9662e-55	0.425501	0.588	0.415	1.69223e-50	2	GRINA
4.91967e-54	0.488257	0.436	0.273	1.19509e-49	2	DDX60L
4.79346e-53	0.463336	0.498	0.337	1.16443e-48	2	SP100
8.25898e-52	0.479707	0.298	0.155	2.00627e-47	2	APOL2
1.26903e-51	0.498771	0.269	0.135	3.08272e-47	2	DAPP1
1.71416e-51	0.448413	0.56	0.399	4.16403e-47	2	BAZ1A
1.79592e-51	0.324559	0.95	0.905	4.36264e-47	2	TXNIP
9.0273e-50	0.25899	0.921	0.855	2.19291e-45	2	SERPINA1
9.03415e-50	0.537798	0.561	0.415	2.19458e-45	2	FFAR2
2.9393e-49	0.430719	0.74	0.608	7.14014e-45	2	CD74
1.08847e-46	0.341842	0.742	0.634	2.6441e-42	2	ARRB2
1.70107e-46	0.406001	0.669	0.544	4.13223e-42	2	SMCHD1
1.876e-46	0.495628	0.257	0.13	4.55718e-42	2	CEACAM1
5.45733e-46	0.460257	0.336	0.197	1.3257e-41	2	RBCK1
8.30692e-46	0.440601	0.335	0.192	2.01792e-41	2	TMEM140
2.14208e-44	0.445227	0.337	0.195	5.20353e-40	2	TRIM38
3.16219e-44	0.4334	0.296	0.163	7.6816e-40	2	CHMP5
5.9011e-44	0.372434	0.581	0.434	1.4335e-39	2	LCP2
1.56314e-43	0.272822	0.814	0.728	3.79719e-39	2	CD53
2.25474e-41	0.438985	0.309	0.179	5.47723e-37	2	ZNFX1
3.24306e-41	0.433561	0.29	0.163	7.87803e-37	2	TRANK1
3.31924e-40	0.506993	0.402	0.272	8.06309e-36	2	TNFSF10
1.00254e-39	0.444835	0.345	0.21	2.43537e-35	2	AC012368.1
1.23205e-39	0.450258	0.253	0.136	2.99289e-35	2	ETV6
1.27564e-38	0.389504	0.552	0.427	3.09879e-34	2	FLOT1
3.28744e-38	0.449918	0.253	0.139	7.98584e-34	2	TRIM21
3.39451e-38	0.372843	0.399	0.258	8.24595e-34	2	PSME1
4.06099e-37	0.32257	0.683	0.543	9.86496e-33	2	TNFAIP2
1.98598e-36	0.306499	0.63	0.504	4.82435e-32	2	AIF1
1.25662e-35	0.416181	0.449	0.321	3.05257e-31	2	LIMK2
1.3661e-35	0.383794	0.414	0.271	3.31852e-31	2	CCR1
1.85858e-34	0.382733	0.825	0.739	4.51486e-30	2	PLEK
6.62689e-34	0.277844	0.768	0.68	1.6098e-29	2	SEC14L1
2.79663e-33	0.369995	0.363	0.236	6.79357e-29	2	PIK3AP1
3.23521e-32	0.417136	0.26	0.153	7.85896e-28	2	PDCD4
1.32326e-31	0.377596	0.306	0.191	3.21447e-27	2	IL1RAP
7.48641e-31	0.376195	0.306	0.193	1.8186e-26	2	PSMB8
1.81246e-30	0.400847	0.351	0.237	4.40282e-26	2	TOP1
2.00085e-30	0.335663	0.756	0.673	4.86046e-26	2	CXCR4
1.50426e-29	0.357902	0.373	0.257	3.65415e-25	2	NMI
5.08822e-29	0.405846	0.42	0.303	1.23603e-24	2	TNFAIP6
1.23478e-28	0.375574	0.54	0.434	2.99952e-24	2	APOBEC3A
1.60084e-28	0.275661	0.608	0.496	3.88875e-24	2	TLR2
6.57756e-28	0.405598	0.347	0.238	1.59782e-23	2	ACSL4
6.85529e-28	0.284312	0.469	0.344	1.66529e-23	2	CLEC2B
3.42155e-27	0.341319	0.602	0.497	8.31163e-23	2	SERPINB1
4.63304e-27	0.319223	0.462	0.351	1.12546e-22	2	PELI1
4.95587e-27	0.379003	0.3	0.193	1.20388e-22	2	KCNJ2
9.27859e-27	0.390623	0.281	0.181	2.25395e-22	2	DEK
3.65837e-26	0.319004	0.43	0.318	8.8869e-22	2	IL13RA1
4.34487e-26	0.462431	0.316	0.219	1.05546e-21	2	FURIN
7.63709e-25	0.286256	0.46	0.347	1.8552e-20	2	RALB
3.95819e-24	0.276897	0.503	0.395	9.61524e-20	2	USP15
1.13893e-23	0.319752	0.368	0.264	2.7667e-19	2	SBNO2
1.31519e-22	0.300768	0.381	0.275	3.19485e-18	2	PITPNA
2.44187e-22	0.333967	0.36	0.258	5.93178e-18	2	LAT2
2.97986e-22	0.310153	0.292	0.195	7.23867e-18	2	GPBP1
4.4436e-21	0.314049	0.331	0.234	1.07944e-16	2	CASP1
4.70112e-21	0.263963	0.391	0.29	1.142e-16	2	PDE4B
6.95489e-21	0.327221	0.271	0.181	1.68948e-16	2	MEFV
6.97475e-21	0.301793	0.502	0.403	1.69431e-16	2	CPD
2.16003e-20	0.332492	0.257	0.173	5.24714e-16	2	ATG3
6.70609e-20	0.281355	0.531	0.445	1.62904e-15	2	PHC2
2.03517e-19	0.2695	0.474	0.375	4.94383e-15	2	HIF1A
2.98431e-19	0.324242	0.263	0.18	7.24948e-15	2	DYNLT1
6.77838e-19	0.264169	0.562	0.465	1.6466e-14	2	SOCS3
2.26065e-18	0.286885	0.3	0.214	5.49158e-14	2	PSMB3
7.04904e-18	0.263339	0.436	0.344	1.71235e-13	2	TAPBP
2.09535e-17	0.250942	0.418	0.332	5.09002e-13	2	TNFRSF1A
2.69554e-17	0.303337	0.437	0.358	6.54801e-13	2	FKBP5
2.10376e-16	0.254071	0.58	0.51	5.11045e-12	2	CSF2RB
8.91056e-16	0.331515	0.656	0.639	2.16455e-11	2	TSC22D3
2.59029e-15	0.253155	0.354	0.272	6.29234e-11	2	CARD16
3.56884e-15	0.258311	0.251	0.176	8.66943e-11	2	BAZ2A
1.29266e-14	0.286994	0.405	0.334	3.14012e-10	2	UBALD2
6.03656e-14	0.282359	0.412	0.332	1.4664e-09	2	TAGAP
1.41603e-13	0.262623	0.253	0.185	3.43982e-09	2	RICTOR
2.13028e-13	0.258465	0.252	0.183	5.17488e-09	2	CHD1
2.46776e-11	0.287055	0.356	0.29	5.99468e-07	2	HCAR3
7.99574e-09	0.250358	0.661	0.632	0.000194232	2	CEBPD
0	1.85599	0.752	0.172	0	3	S100A12
0	1.75464	0.524	0.074	0	3	MMP9
0	1.34293	0.516	0.078	0	3	PADI4
0	1.11531	0.999	0.884	0	3	S100A8
0	1.01404	1	0.909	0	3	S100A9
7.17222e-308	1.17283	0.741	0.24	1.74228e-303	3	CDA
7.68879e-308	1.3582	0.411	0.061	1.86776e-303	3	RFLNB
4.19732e-283	1.3643	0.521	0.116	1.01961e-278	3	FCN1
7.86348e-276	1.26579	0.395	0.063	1.9102e-271	3	PGLYRP1
1.51844e-275	1.15295	0.788	0.312	3.68861e-271	3	S100A4
4.70433e-258	1.05884	0.887	0.47	1.14278e-253	3	S100A6
3.1497e-246	1.07732	0.608	0.178	7.65125e-242	3	APMAP
1.44056e-234	1.03253	0.817	0.404	3.4994e-230	3	VIM
5.51151e-233	1.14488	0.551	0.155	1.33886e-228	3	CKAP4
2.92658e-231	0.942545	0.777	0.308	7.10924e-227	3	MME
1.19267e-227	0.512157	1	0.984	2.89723e-223	3	ACTB
6.29931e-219	1.05072	0.471	0.116	1.53023e-214	3	PLP2
3.15367e-206	0.973352	0.59	0.191	7.6609e-202	3	PYGL
1.91543e-200	0.998249	0.483	0.13	4.65296e-196	3	PPP2R5A
1.28053e-194	1.02751	0.504	0.146	3.11065e-190	3	CST7
8.33685e-185	0.96316	0.535	0.169	2.02519e-180	3	CYP4F3
1.18752e-184	0.891956	0.28	0.045	2.88473e-180	3	2021-03-01
1.02183e-181	0.726899	0.887	0.475	2.48223e-177	3	VNN2
1.3942e-181	0.586918	0.987	0.762	3.38678e-177	3	SELL
1.83754e-166	0.905415	0.353	0.081	4.46375e-162	3	ADD3
2.68158e-158	0.980163	0.288	0.057	6.5141e-154	3	ARG1
1.76216e-156	0.890528	0.452	0.14	4.28063e-152	3	TSPO
3.15037e-155	0.824915	0.465	0.143	7.65287e-151	3	MGAM
3.70626e-154	0.822981	0.607	0.238	9.00324e-150	3	DYSF
7.66332e-148	0.661594	0.882	0.576	1.86157e-143	3	RTN3
2.04214e-145	0.831106	0.567	0.223	4.96076e-141	3	PGD
7.69846e-145	0.807539	0.671	0.314	1.87011e-140	3	TKT
5.34863e-141	0.970354	0.271	0.057	1.29929e-136	3	EMB
5.67911e-140	0.744919	0.741	0.387	1.37957e-135	3	CORO1A
1.32609e-136	1.09879	0.599	0.276	3.22135e-132	3	HMGB2
1.71021e-135	0.872561	0.463	0.161	4.15444e-131	3	PNPLA2
2.59976e-135	0.85663	0.401	0.123	6.31534e-131	3	S100P
5.65452e-131	0.768529	0.427	0.138	1.3736e-126	3	GNG2
1.67889e-130	0.696286	0.801	0.453	4.07835e-126	3	MEGF9
1.44819e-128	0.781809	0.369	0.106	3.51793e-124	3	CRISPLD2
2.113e-126	0.75795	0.515	0.198	5.1329e-122	3	QPCT
6.13949e-125	0.788885	0.294	0.073	1.49141e-120	3	TP53I11
2.95665e-119	0.48555	0.978	0.711	7.1823e-115	3	MNDA
3.81498e-115	0.688446	0.57	0.248	9.26735e-111	3	CR1
3.44131e-113	0.746851	0.585	0.27	8.35963e-109	3	LBR
1.85351e-107	0.718433	0.6	0.288	4.50256e-103	3	USP10
2.20808e-106	0.357958	0.991	0.932	5.36388e-102	3	LCP1
2.961e-106	0.646753	0.58	0.258	7.19287e-102	3	PROK2
3.43986e-106	0.675644	0.634	0.315	8.35611e-102	3	NCF1C
4.48308e-105	0.59914	0.762	0.448	1.08903e-100	3	ITGB2
3.98739e-103	0.561105	0.869	0.627	9.68616e-99	3	CAP1
5.50001e-103	0.524297	0.74	0.413	1.33606e-98	3	HSPA1A
3.75052e-101	0.422559	0.982	0.737	9.11077e-97	3	RGS2
1.14207e-100	0.492161	0.968	0.762	2.77433e-96	3	C5AR1
5.13368e-96	0.455399	0.962	0.701	1.24707e-91	3	BASP1
9.37519e-96	0.701908	0.339	0.113	2.27742e-91	3	CLEC4D
6.28754e-95	0.451876	0.913	0.618	1.52737e-90	3	ARHGDIB
1.14833e-94	0.712811	0.514	0.233	2.78953e-90	3	LIMD2
3.5412e-94	0.49597	0.887	0.666	8.60227e-90	3	OAZ1
4.50013e-94	0.693597	0.387	0.145	1.09317e-89	3	BST1
6.33078e-94	0.448235	0.931	0.722	1.53787e-89	3	CNN2
2.19482e-93	0.430138	0.954	0.835	5.33167e-89	3	CFL1
9.98279e-93	0.623762	0.694	0.397	2.42502e-88	3	STK17B
1.18648e-92	0.601457	0.686	0.385	2.8822e-88	3	CMTM2
4.8903e-91	0.617495	0.631	0.327	1.18795e-86	3	IL17RA
1.06142e-89	0.660693	0.289	0.089	2.5784e-85	3	METTL9
4.3087e-88	0.639812	0.432	0.177	1.04667e-83	3	TMX4
1.34948e-86	0.737997	0.342	0.124	3.27816e-82	3	RUBCNL
1.28326e-84	0.637973	0.569	0.29	3.1173e-80	3	CALM1
1.82434e-84	0.597698	0.708	0.422	4.43169e-80	3	YWHAB
9.24036e-84	0.448954	0.912	0.697	2.24467e-79	3	GCA
1.19815e-83	0.684032	0.36	0.136	2.91054e-79	3	ANPEP
4.71882e-83	0.462694	0.916	0.716	1.1463e-78	3	PFN1
5.2922e-83	0.316286	0.999	0.966	1.28558e-78	3	S100A11
5.76862e-82	0.593033	0.281	0.089	1.40131e-77	3	GRK6
1.32482e-80	0.587529	0.485	0.219	3.21824e-76	3	MAP4K4
9.54083e-76	0.498064	0.821	0.588	2.31766e-71	3	MYL6
3.02321e-75	0.578414	0.675	0.411	7.34398e-71	3	MYH9
3.17913e-74	0.445442	0.874	0.66	7.72275e-70	3	ZYX
2.26386e-72	0.601164	0.383	0.16	5.49937e-68	3	CSTA
6.64086e-72	0.751566	0.359	0.152	1.6132e-67	3	PLBD1
2.86785e-71	0.604924	0.364	0.151	6.96658e-67	3	LILRA5
3.15977e-71	0.406716	0.909	0.731	7.67571e-67	3	LSP1
2.66997e-70	0.530681	0.508	0.248	6.48588e-66	3	MMP25
3.45065e-69	0.505825	0.697	0.436	8.38231e-65	3	ACSL1
6.38453e-69	0.474962	0.666	0.379	1.55093e-64	3	JAML
1.0971e-68	0.579616	0.405	0.18	2.66506e-64	3	UBN1
1.80674e-68	0.541618	0.503	0.248	4.38894e-64	3	DHRS7
1.08372e-67	0.560322	0.478	0.238	2.63256e-63	3	TXN
1.59168e-67	0.591749	0.428	0.197	3.8665e-63	3	TUBA4A
4.65842e-66	0.378213	0.797	0.524	1.13162e-61	3	SLC2A3
1.0155e-65	0.562187	0.495	0.248	2.46685e-61	3	RAB27A
1.8945e-65	0.590733	0.279	0.102	4.60211e-61	3	SLC40A1
3.51205e-65	0.565956	0.429	0.201	8.53147e-61	3	PRKCB
3.90118e-65	0.448628	0.846	0.633	9.47676e-61	3	SH3BGRL3
7.07972e-65	0.410193	0.872	0.681	1.7198e-60	3	ACTG1
9.93029e-65	0.387873	0.897	0.71	2.41227e-60	3	RAC2
8.42359e-64	0.477673	0.667	0.397	2.04626e-59	3	IGF2R
7.75057e-63	0.569223	0.383	0.171	1.88277e-58	3	ITGAM
1.46768e-61	0.483917	0.631	0.373	3.56528e-57	3	NCF4
1.92605e-61	0.56392	0.297	0.116	4.67876e-57	3	ARID3A
5.91731e-61	0.396918	0.867	0.652	1.43743e-56	3	EVI2B
1.48369e-60	0.599611	0.29	0.113	3.60419e-56	3	CSGALNACT2
2.3071e-60	0.49305	0.552	0.303	5.6044e-56	3	ICAM3
9.90785e-58	0.438362	0.646	0.388	2.40681e-53	3	MYADM
2.45656e-57	0.524796	0.495	0.269	5.96747e-53	3	EIF4G2
4.15245e-57	0.524006	0.644	0.416	1.00871e-52	3	IRS2
4.28233e-57	0.607619	0.435	0.224	1.04026e-52	3	IFRD1
4.43471e-57	0.533902	0.509	0.275	1.07728e-52	3	TUBA1A
1.32863e-56	0.527023	0.444	0.225	3.22752e-52	3	GLIPR1
3.8952e-56	0.502039	0.533	0.294	9.46222e-52	3	ABTB1
5.07768e-55	0.494364	0.475	0.249	1.23347e-50	3	MAPK14
1.36306e-54	0.445612	0.624	0.367	3.31115e-50	3	IL6R
3.69698e-53	0.403005	0.702	0.462	8.9807e-49	3	LRP10
4.61816e-53	0.578356	0.292	0.124	1.12184e-48	3	ZNF106
4.18018e-52	0.531276	0.299	0.128	1.01545e-47	3	CLEC12A
1.65359e-51	0.555015	0.341	0.158	4.01689e-47	3	RNF10
5.52378e-51	0.484953	0.528	0.304	1.34184e-46	3	FRAT2
7.4849e-51	0.496492	0.46	0.24	1.81823e-46	3	ARHGAP30
8.74425e-50	0.489205	0.301	0.131	2.12415e-45	3	FAM107B
1.70913e-49	0.512111	0.32	0.144	4.15182e-45	3	SOS2
4.2869e-49	0.499075	0.334	0.154	1.04137e-44	3	ORAI2
1.57943e-48	0.462965	0.545	0.322	3.83676e-44	3	ANXA11
7.9965e-48	0.498208	0.357	0.172	1.94251e-43	3	MAPK1
4.92775e-47	0.480834	0.372	0.186	1.19705e-42	3	H2AFY
1.90532e-46	0.484453	0.423	0.224	4.62841e-42	3	CDKN2D
4.33728e-46	0.46901	0.404	0.208	1.05361e-41	3	BIN2
8.89158e-46	0.450689	0.489	0.275	2.15994e-41	3	ALOX5
1.03418e-45	0.345006	0.802	0.615	2.51224e-41	3	KLF6
1.05217e-45	0.455853	0.274	0.119	2.55592e-41	3	MAP3K3
2.17717e-45	0.528985	0.573	0.363	5.28879e-41	3	LYZ
6.26026e-45	0.458083	0.696	0.509	1.52074e-40	3	CD55
2.22724e-44	0.460301	0.336	0.162	5.41041e-40	3	IMPDH1
1.46171e-43	0.430128	0.621	0.397	3.55079e-39	3	GNAS
1.90625e-43	0.357235	0.715	0.478	4.63067e-39	3	COTL1
1.30391e-42	0.323226	0.483	0.272	3.16746e-38	3	GAPDH
5.05581e-42	0.449577	0.337	0.166	1.22816e-37	3	FAM120A
2.86872e-41	0.383981	0.724	0.52	6.96868e-37	3	GMFG
4.98198e-41	0.43685	0.256	0.112	1.21022e-36	3	KIAA0319L
2.23844e-40	0.577753	0.361	0.195	5.43762e-36	3	PFKFB3
6.4294e-40	0.440929	0.269	0.122	1.56183e-35	3	HSDL2
1.96608e-39	0.40749	0.396	0.211	4.77599e-35	3	CAB39
2.15035e-39	0.300517	0.891	0.735	5.22363e-35	3	ARPC2
3.82344e-38	0.470767	0.269	0.125	9.28791e-34	3	STK38
8.45486e-38	0.364604	0.74	0.576	2.05385e-33	3	TPM3
9.50465e-38	0.467201	0.291	0.142	2.30887e-33	3	PCNX1
1.70842e-37	0.449751	0.256	0.117	4.15009e-33	3	CD302
7.73722e-37	0.444526	0.251	0.115	1.87953e-32	3	ULK1
1.16915e-36	0.397824	0.384	0.209	2.8401e-32	3	RGS18
3.55793e-36	0.353655	0.63	0.422	8.64293e-32	3	DOK3
4.75622e-36	0.419534	0.42	0.24	1.15538e-31	3	SH3KBP1
4.93263e-36	0.345822	0.706	0.499	1.19824e-31	3	TALDO1
2.33281e-35	0.32721	0.796	0.618	5.66685e-31	3	GPSM3
6.18125e-35	0.361388	0.574	0.368	1.50155e-30	3	RASSF2
1.15633e-34	0.424038	0.254	0.12	2.80897e-30	3	ZNF281
1.20073e-34	0.403754	0.357	0.19	2.91682e-30	3	PIK3CD
1.72013e-34	0.333615	0.655	0.445	4.17853e-30	3	MSL1
3.78713e-34	0.335368	0.735	0.556	9.1997e-30	3	ANP32A
4.03254e-34	0.344693	0.555	0.355	9.79585e-30	3	APBB1IP
4.10467e-34	0.384516	0.445	0.264	9.97106e-30	3	SLC44A2
8.34039e-34	0.371805	0.479	0.291	2.02605e-29	3	ROCK1
1.18852e-33	0.267917	0.812	0.64	2.88716e-29	3	IQGAP1
1.74579e-33	0.43806	0.31	0.162	4.24087e-29	3	LAMTOR4
2.38355e-33	0.405945	0.334	0.179	5.79011e-29	3	CTDSP1
2.88322e-33	0.385225	0.341	0.182	7.00391e-29	3	CTDSP2
5.114e-33	0.353758	0.53	0.336	1.24229e-28	3	FLOT2
8.36751e-33	0.332376	0.701	0.515	2.03264e-28	3	TLN1
1.40384e-32	0.353235	0.444	0.259	3.41021e-28	3	SELPLG
2.08759e-32	0.324422	0.733	0.559	5.07118e-28	3	YWHAZ
2.52614e-32	0.383552	0.339	0.182	6.13651e-28	3	WASF2
3.38838e-32	0.370599	0.422	0.249	8.23106e-28	3	MAPKAPK2
9.14737e-32	0.398733	0.255	0.125	2.22208e-27	3	MAPK3
1.86501e-31	0.36507	0.621	0.439	4.53049e-27	3	MYL12A
1.91102e-31	0.381818	0.304	0.158	4.64226e-27	3	RAB3D
1.00285e-30	0.36711	0.331	0.179	2.43613e-26	3	NIN
1.2108e-30	0.33925	0.529	0.349	2.94128e-26	3	PLXNC1
2.73682e-30	0.384082	0.48	0.309	6.64829e-26	3	LASP1
2.74649e-30	0.395453	0.439	0.27	6.67177e-26	3	PTPRE
5.06169e-30	0.39075	0.31	0.169	1.22958e-25	3	ANXA3
5.35128e-30	0.37071	0.369	0.211	1.29993e-25	3	FKBP8
2.76988e-29	0.368488	0.256	0.129	6.72859e-25	3	TRAPPC1
8.60377e-29	0.339212	0.396	0.234	2.09003e-24	3	CDC42EP3
8.77324e-29	0.304659	0.651	0.465	2.1312e-24	3	TLR4
1.00203e-28	0.386402	0.293	0.156	2.43413e-24	3	PPP3CA
1.10314e-28	0.377839	0.56	0.392	2.67975e-24	3	CD37
1.57174e-28	0.29835	0.641	0.448	3.81807e-24	3	MSRB1
2.07869e-28	0.284684	0.672	0.482	5.04954e-24	3	KLF2
2.12465e-28	0.391494	0.284	0.152	5.1612e-24	3	SNX3
2.29961e-28	0.444179	0.318	0.181	5.58622e-24	3	TOB1
3.04658e-28	0.272217	0.807	0.635	7.40075e-24	3	GNAI2
3.83732e-28	0.41975	0.503	0.34	9.32161e-24	3	AL034397.3
3.97478e-28	0.262713	0.656	0.465	9.65553e-24	3	GRN
5.98629e-28	0.35611	0.299	0.162	1.45419e-23	3	ASAP1
8.87822e-28	0.346585	0.422	0.255	2.1567e-23	3	STAT5B
1.18239e-27	0.309164	0.598	0.413	2.87227e-23	3	ADAM8
1.74099e-27	0.365067	0.502	0.334	4.22922e-23	3	FKBP1A
8.81695e-27	0.358925	0.305	0.17	2.14181e-22	3	CHIC2
1.07184e-26	0.34458	0.616	0.452	2.60371e-22	3	YPEL5
4.08155e-26	0.327197	0.484	0.312	9.91491e-22	3	OSBPL8
4.14665e-26	0.324597	0.525	0.358	1.0073e-21	3	SKAP2
6.2463e-26	0.263197	0.343	0.208	1.51735e-21	3	HSPA1B
7.06239e-26	0.284082	0.736	0.574	1.7156e-21	3	BTG1
7.1683e-26	0.354625	0.251	0.131	1.74132e-21	3	AC011472.2
1.1376e-25	0.379903	0.298	0.166	2.76345e-21	3	TMEM71
1.17659e-25	0.321774	0.508	0.337	2.85817e-21	3	GRK2
1.51145e-25	0.300732	0.718	0.548	3.67161e-21	3	ACTR2
1.84907e-25	0.28962	0.64	0.465	4.49176e-21	3	ACTN1
2.32556e-25	0.303632	0.481	0.314	5.64924e-21	3	PXN
3.98648e-25	0.328476	0.351	0.207	9.68395e-21	3	PADI2
5.58004e-25	0.251682	0.722	0.542	1.3555e-20	3	MYO1F
1.78077e-24	0.28569	0.661	0.498	4.32585e-20	3	CCNI
3.21228e-24	0.343781	0.309	0.178	7.80326e-20	3	SEC62
9.50376e-24	0.313104	0.418	0.265	2.30865e-19	3	NRBF2
9.97632e-24	0.386631	0.319	0.191	2.42345e-19	3	TBL1X
1.51943e-23	0.276372	0.453	0.299	3.69101e-19	3	RHOB
3.21264e-23	0.261105	0.589	0.408	7.80414e-19	3	ARHGAP9
6.94789e-23	0.319234	0.388	0.244	1.68778e-18	3	PPP1R12A
2.59581e-22	0.344105	0.419	0.276	6.30575e-18	3	NDEL1
3.28254e-22	0.353773	0.255	0.143	7.97395e-18	3	PRKACA
5.66317e-22	0.304091	0.463	0.315	1.3757e-17	3	ALPL
8.82959e-22	0.306097	0.45	0.294	2.14488e-17	3	TIMP2
1.37501e-21	0.266121	0.696	0.542	3.34018e-17	3	CAPZB
2.95078e-21	0.338609	0.443	0.301	7.16804e-17	3	TSEN34
3.06614e-21	0.321167	0.253	0.141	7.44827e-17	3	GAPT
5.78099e-21	0.285067	0.533	0.376	1.40432e-16	3	ARPC4
6.17222e-21	0.309547	0.253	0.142	1.49936e-16	3	JPT1
9.53785e-21	0.312739	0.402	0.26	2.31693e-16	3	HIST1H2AC
1.27341e-20	0.313471	0.44	0.297	3.09337e-16	3	VAPA
1.48978e-20	0.276372	0.608	0.441	3.61897e-16	3	MSN
1.97025e-20	0.272144	0.462	0.313	4.78614e-16	3	APLP2
3.28816e-20	0.263301	0.529	0.372	7.9876e-16	3	RNF130
3.72174e-20	0.293271	0.405	0.264	9.04085e-16	3	FBXL5
9.32531e-20	0.26061	0.512	0.355	2.2653e-15	3	FKBP5
1.37752e-19	0.266266	0.302	0.182	3.34628e-15	3	FAM126B
2.0949e-19	0.263534	0.46	0.308	5.08893e-15	3	RASSF3
2.35018e-19	0.299969	0.299	0.181	5.70907e-15	3	TM9SF2
2.60399e-19	0.305837	0.292	0.175	6.32561e-15	3	NFIL3
4.84187e-19	0.297489	0.27	0.159	1.17619e-14	3	CNPY3
6.19466e-19	0.330198	0.332	0.211	1.50481e-14	3	MID1IP1
9.39131e-19	0.278398	0.405	0.269	2.28134e-14	3	STAT6
1.06658e-18	0.261239	0.488	0.338	2.59094e-14	3	PTBP3
1.24725e-18	0.285178	0.41	0.272	3.02981e-14	3	JAK1
1.34475e-18	0.288591	0.254	0.147	3.26667e-14	3	PARVG
5.79727e-18	0.307874	0.273	0.166	1.40827e-13	3	C16orf72
9.44987e-18	0.316958	0.271	0.165	2.29556e-13	3	MAX
3.29238e-17	0.274812	0.373	0.243	7.99785e-13	3	RALBP1
3.97553e-17	0.277662	0.386	0.26	9.65736e-13	3	RXRA
5.87317e-17	0.269526	0.333	0.215	1.42671e-12	3	SERINC3
6.15829e-17	0.267418	0.294	0.183	1.49597e-12	3	CASP8
1.04531e-16	0.272592	0.254	0.152	2.53926e-12	3	LILRA2
1.33329e-16	0.280698	0.387	0.262	3.23882e-12	3	ACTN4
1.45904e-16	0.276173	0.276	0.169	3.5443e-12	3	WDR26
7.76809e-16	0.269345	0.304	0.194	1.88702e-11	3	ARHGEF1
4.4409e-15	0.253365	0.367	0.247	1.07878e-10	3	RASGRP4
8.4167e-15	0.253694	0.358	0.246	2.04458e-10	3	PAIP2
5.75642e-14	0.266151	0.283	0.184	1.39835e-09	3	CCNDBP1
2.88344e-13	0.255075	0.399	0.285	7.00444e-09	3	MAP3K2
1.05522e-12	0.280263	0.279	0.188	2.56334e-08	3	RB1CC1
1.17366e-12	0.258314	0.365	0.255	2.85104e-08	3	DEDD2
3.41061e-108	0.629136	0.986	0.891	8.28507e-104	4	S100A8
6.44659e-103	0.662911	0.91	0.708	1.56601e-98	4	GCA
5.25374e-99	1.05628	0.593	0.292	1.27624e-94	4	HMGB2
2.45867e-97	0.632214	0.929	0.778	5.97259e-93	4	SELL
2.70829e-95	0.821191	0.669	0.35	6.57899e-91	4	FKBP5
3.39164e-94	0.620306	0.916	0.767	8.23898e-90	4	SMAP2
5.61371e-93	0.589986	0.971	0.909	1.36368e-88	4	TXNIP
2.36465e-87	0.598637	0.91	0.727	5.74422e-83	4	RIPOR2
5.81879e-87	0.846305	0.731	0.476	1.4135e-82	4	MEGF9
5.27111e-78	0.72631	0.762	0.506	1.28046e-73	4	VNN2
3.38406e-75	0.457299	0.988	0.915	8.22057e-71	4	S100A9
1.61122e-74	0.929887	0.386	0.147	3.91397e-70	4	FCN1
1.57437e-71	0.82657	0.567	0.306	3.82445e-67	4	USP10
7.60483e-71	0.518905	0.921	0.736	1.84736e-66	4	CXCR2
5.67631e-67	0.281163	1	0.983	1.37889e-62	4	IFITM2
9.44679e-58	0.746086	0.586	0.347	2.29481e-53	4	MME
1.28927e-57	0.632584	0.793	0.658	3.13189e-53	4	TAGLN2
3.70405e-56	0.681557	0.66	0.438	8.99787e-52	4	VIM
1.15407e-54	0.578716	0.697	0.526	2.80346e-50	4	PREX1
7.82662e-50	0.577593	0.78	0.626	1.90124e-45	4	KLF6
1.00406e-47	0.515779	0.771	0.619	2.43906e-43	4	SORL1
5.36914e-47	0.58047	0.651	0.478	1.30427e-42	4	LRP10
2.07677e-46	0.527574	0.765	0.652	5.04489e-42	4	IQGAP1
2.78751e-45	0.720489	0.468	0.272	6.77142e-41	4	CR1
1.29884e-44	0.727937	0.353	0.172	3.15514e-40	4	ARHGEF40
1.88113e-44	0.771553	0.402	0.217	4.56963e-40	4	APMAP
5.23927e-43	0.722075	0.432	0.251	1.27272e-38	4	PGD
2.34027e-40	0.495701	0.725	0.602	5.68498e-36	4	CFLAR
2.40506e-37	0.624726	0.505	0.318	5.84238e-33	4	ALPL
3.61885e-36	0.334766	0.895	0.756	8.79091e-32	4	RGS2
4.31905e-36	0.30735	0.91	0.729	1.04918e-31	4	MNDA
9.49471e-36	0.513161	0.627	0.476	2.30645e-31	4	TLR4
1.26741e-35	0.68448	0.382	0.217	3.07879e-31	4	RGS18
1.59294e-34	0.676343	0.34	0.177	3.86958e-30	4	CST7
1.03174e-33	0.494312	0.603	0.456	2.50631e-29	4	ACSL1
1.28605e-33	0.464075	0.677	0.561	3.12406e-29	4	VSIR
1.98573e-33	0.271987	0.966	0.937	4.82374e-29	4	DUSP1
4.87582e-33	0.629464	0.444	0.291	1.18443e-28	4	B4GALT5
5.10748e-32	0.296331	0.885	0.72	1.24071e-27	4	BASP1
9.06805e-32	0.475178	0.597	0.46	2.20281e-27	4	MSL1
1.09064e-31	0.605753	0.323	0.173	2.64937e-27	4	CD93
5.73909e-31	0.404768	0.765	0.645	1.39414e-26	4	ARHGDIB
1.82531e-30	0.400299	0.784	0.742	4.43405e-26	4	HCLS1
2.41576e-30	0.541286	0.501	0.36	5.86837e-26	4	PLXNC1
1.3601e-29	0.487679	0.47	0.311	3.30397e-25	4	NCOA4
2.36679e-29	0.552846	0.552	0.409	5.74941e-25	4	MYADM
3.93335e-29	0.454221	0.602	0.477	9.55489e-25	4	BCL6
3.27914e-28	0.606427	0.328	0.186	7.96568e-24	4	FAM126B
3.96171e-28	0.565412	0.362	0.214	9.62378e-24	4	ZC3HAV1
1.00112e-27	0.587369	0.494	0.369	2.43191e-23	4	SKAP2
1.28448e-27	0.49669	0.536	0.409	3.12027e-23	4	CELF2
1.74874e-26	0.278007	0.928	0.896	4.24805e-22	4	MCL1
2.06785e-26	0.49683	0.487	0.354	5.02321e-22	4	IL17RA
2.85824e-26	0.552332	0.366	0.229	6.94323e-22	4	PYGL
1.92214e-25	0.627525	0.299	0.172	4.66925e-21	4	MGAM
2.26186e-25	0.383098	0.7	0.607	5.49452e-21	4	RTN3
3.97667e-25	0.325726	0.756	0.633	9.66013e-21	4	TSC22D3
4.13966e-25	0.385104	0.574	0.453	1.00561e-20	4	PHC2
4.23029e-25	0.359646	0.755	0.672	1.02762e-20	4	EVI2B
5.21467e-25	0.483712	0.456	0.321	1.26675e-20	4	FRAT2
7.34203e-25	0.504998	0.495	0.372	1.78353e-20	4	SLC11A1
9.31138e-25	0.371215	0.729	0.648	2.26192e-20	4	VMP1
2.42005e-24	0.3824	0.383	0.232	5.87879e-20	4	S100A12
2.47355e-24	0.619471	0.318	0.189	6.00874e-20	4	GNAQ
1.01492e-23	0.348536	0.631	0.495	2.46544e-19	4	KLF2
2.02563e-23	0.374707	0.636	0.563	4.92065e-19	4	ACTR2
2.80803e-23	0.447911	0.553	0.449	6.82127e-19	4	YWHAB
6.29786e-23	0.296451	0.793	0.685	1.52988e-18	4	FAM129A
2.27456e-22	0.500294	0.451	0.328	5.52535e-18	4	CPPED1
2.84783e-22	0.44185	0.53	0.422	6.91796e-18	4	IGF2R
4.39822e-22	0.548632	0.296	0.174	1.06842e-17	4	PRKDC
4.56763e-22	0.572305	0.311	0.191	1.10957e-17	4	IRAK3
8.82222e-22	0.328203	0.668	0.565	2.14309e-17	4	XPO6
1.05331e-21	0.488151	0.387	0.27	2.5587e-17	4	MMP25
1.05708e-21	0.446474	0.491	0.384	2.56785e-17	4	KCNJ15
3.27801e-21	0.339641	0.686	0.584	7.96295e-17	4	IL1R2
1.39125e-20	0.49088	0.414	0.299	3.37961e-16	4	AKAP13
4.48929e-20	0.553536	0.283	0.173	1.09054e-15	4	SLC31A2
6.10408e-20	0.49786	0.383	0.273	1.4828e-15	4	SELPLG
7.66768e-20	0.266926	0.801	0.75	1.86263e-15	4	ARPC2
1.58115e-19	0.410991	0.499	0.39	3.84092e-15	4	IL6R
3.62624e-19	0.304677	0.711	0.655	8.80886e-15	4	SH3BGRL3
5.33404e-19	0.429897	0.567	0.49	1.29575e-14	4	ADGRE5
5.70928e-19	0.478817	0.336	0.227	1.3869e-14	4	MBNL1
5.71944e-19	0.394598	0.53	0.441	1.38937e-14	4	DOK3
7.06087e-19	0.352914	0.586	0.494	1.71523e-14	4	LRRK2
2.43539e-18	0.373497	0.605	0.527	5.91605e-14	4	PTEN
4.24076e-18	0.524837	0.271	0.171	1.03017e-13	4	CCND3
9.61684e-18	0.305828	0.626	0.521	2.33612e-13	4	P2RY13
1.38942e-17	0.273151	0.684	0.586	3.37517e-13	4	SLA
2.22361e-17	0.473986	0.381	0.282	5.40159e-13	4	CHST15
2.43086e-17	0.272106	0.704	0.652	5.90505e-13	4	CAP1
2.45538e-17	0.481477	0.464	0.38	5.96461e-13	4	CALM2
2.62077e-17	0.392041	0.482	0.361	6.36639e-13	4	S100A4
3.13676e-17	0.522586	0.302	0.2	7.61981e-13	4	UBN1
7.89502e-17	0.371694	0.522	0.425	1.91786e-12	4	STK17B
1.61109e-16	0.405809	0.499	0.424	3.91366e-12	4	ARHGAP9
3.78031e-16	0.261817	0.706	0.607	9.18313e-12	4	CXCR1
4.23691e-16	0.400463	0.505	0.415	1.02923e-11	4	CMTM2
5.60906e-16	0.387777	0.464	0.387	1.36255e-11	4	RASSF2
8.02086e-16	0.368639	0.527	0.437	1.94843e-11	4	IRS2
1.41928e-15	0.443459	0.325	0.23	3.44772e-11	4	QPCT
1.62906e-15	0.421175	0.344	0.243	3.9573e-11	4	MAP4K4
3.1412e-15	0.434968	0.315	0.217	7.6306e-11	4	TUBA4A
3.97926e-15	0.300179	0.634	0.573	9.66642e-11	4	ANP32A
4.19559e-15	0.351865	0.482	0.407	1.01919e-10	4	CD37
4.30207e-15	0.509475	0.295	0.201	1.04506e-10	4	H2AFY
5.50935e-15	0.303335	0.65	0.613	1.33833e-10	4	CDC42SE1
6.06e-15	0.350477	0.448	0.352	1.4721e-10	4	AL034397.3
6.2819e-15	0.502991	0.314	0.227	1.526e-10	4	CAB39
8.40884e-15	0.367044	0.414	0.327	2.04268e-10	4	ICAM3
1.15935e-14	0.336912	0.445	0.353	2.81629e-10	4	FLOT2
4.37104e-14	0.273157	0.602	0.514	1.06181e-09	4	S100A6
4.77144e-14	0.340643	0.451	0.365	1.15908e-09	4	TLE3
5.00639e-14	0.284393	0.592	0.541	1.21615e-09	4	GMFG
6.82385e-14	0.264352	0.643	0.602	1.65765e-09	4	RAB7A
7.3358e-14	0.433501	0.42	0.332	1.78201e-09	4	CREB5
8.97388e-14	0.365742	0.498	0.439	2.17994e-09	4	MYH9
9.93977e-14	0.475879	0.303	0.214	2.41457e-09	4	FOXO3
1.5579e-13	0.321739	0.53	0.467	3.78445e-09	4	MSRB1
3.00285e-13	0.426237	0.336	0.252	7.29452e-09	4	RALBP1
4.31056e-13	0.448112	0.289	0.196	1.04712e-08	4	CKAP4
5.31679e-13	0.386056	0.42	0.351	1.29155e-08	4	SSH2
6.55528e-13	0.405492	0.271	0.189	1.59241e-08	4	MAPK1
2.93416e-12	0.447336	0.286	0.202	7.12767e-08	4	TMX4
3.09295e-12	0.426777	0.356	0.277	7.51339e-08	4	DYSF
5.81356e-12	0.2605	0.596	0.544	1.41223e-07	4	R3HDM4
1.13492e-11	0.370525	0.485	0.432	2.75696e-07	4	LRRFIP1
1.15989e-11	0.403911	0.345	0.271	2.8176e-07	4	MAPK14
1.92138e-11	0.350415	0.509	0.466	4.66742e-07	4	KPNB1
3.70058e-11	0.415935	0.365	0.3	8.98944e-07	4	RNF24
4.13173e-11	0.336488	0.403	0.33	1.00368e-06	4	MBP
5.33763e-11	0.399948	0.265	0.192	1.29662e-06	4	ITGAM
7.37775e-11	0.259671	0.61	0.56	1.7922e-06	4	KIAA1551
9.24245e-11	0.349841	0.256	0.181	2.24518e-06	4	EGLN1
1.76304e-10	0.328292	0.34	0.27	4.28278e-06	4	STAT5B
1.76952e-10	0.331794	0.39	0.329	4.29851e-06	4	PXN
3.49934e-10	0.326937	0.329	0.255	8.5006e-06	4	ACSL4
4.82845e-10	0.356748	0.381	0.312	1.17293e-05	4	RAB31
5.6695e-10	0.271538	0.547	0.516	1.37724e-05	4	CCNI
9.25755e-10	0.360653	0.374	0.319	2.24884e-05	4	ABTB1
9.55978e-10	0.31019	0.437	0.396	2.32226e-05	4	PRKAR1A
1.01004e-09	0.387493	0.356	0.297	2.4536e-05	4	SH3GLB1
1.41261e-09	0.282079	0.493	0.459	3.43152e-05	4	MYL12A
1.71951e-09	0.361207	0.286	0.217	4.17704e-05	4	RBMS1
4.70178e-09	0.292635	0.428	0.376	0.000114216	4	APBB1IP
5.6128e-09	0.390726	0.365	0.309	0.000136346	4	ROCK1
6.97586e-09	0.310625	0.407	0.353	0.000169458	4	PTBP3
7.50654e-09	0.306327	0.366	0.304	0.000182349	4	LBR
7.86515e-09	0.265326	0.47	0.409	0.00019106	4	JAML
8.02645e-09	0.321617	0.395	0.346	0.000194979	4	ANXA11
1.22865e-08	0.371493	0.254	0.191	0.000298465	4	CASP8
1.28781e-08	0.342999	0.386	0.312	0.000312835	4	RHOB
1.51052e-08	0.384089	0.274	0.209	0.000366936	4	CYP4F3
1.76786e-08	0.265158	0.551	0.537	0.000429449	4	DDX17
2.07756e-08	0.346637	0.285	0.224	0.000504682	4	NEDD9
2.42871e-08	0.332254	0.383	0.333	0.000589982	4	RAB11FIP1
5.90637e-08	0.348682	0.267	0.213	0.00143478	4	FGD3
7.7862e-08	0.260663	0.457	0.422	0.00189142	4	GNAS
9.22854e-08	0.339211	0.257	0.197	0.0022418	4	WASF2
1.64995e-07	0.345807	0.287	0.233	0.00400806	4	PHF21A
1.86112e-07	0.324075	0.296	0.245	0.00452103	4	CDKN2D
2.26819e-07	0.343212	0.281	0.228	0.0055099	4	BIN2
2.45407e-07	0.298528	0.397	0.36	0.00596142	4	IDS
3.0406e-07	0.276352	0.325	0.274	0.00738623	4	HIST1H2AC
4.08913e-07	0.289509	0.436	0.417	0.00993331	4	USP15
4.31549e-07	0.279973	0.426	0.402	0.0104832	4	NCF4
4.38874e-07	0.250293	0.406	0.368	0.0106611	4	RALB
5.38855e-07	0.287802	0.354	0.307	0.0130899	4	RAD21
7.55868e-07	0.27819	0.362	0.324	0.0183615	4	RASSF3
9.7873e-07	0.268286	0.35	0.305	0.0237753	4	ERGIC1
1.27069e-06	0.334695	0.307	0.264	0.0308676	4	TXN
1.589e-06	0.274637	0.32	0.275	0.0385999	4	RAB27A
1.63131e-06	0.271534	0.35	0.308	0.0396277	4	RBM47
1.77262e-06	0.324512	0.254	0.207	0.0430606	4	PIK3CD
3.24093e-06	0.306235	0.295	0.248	0.0787288	4	GLIPR1
6.90929e-06	0.299888	0.364	0.321	0.167841	4	CALM1
1.04775e-05	0.276273	0.386	0.355	0.254519	4	TKT
1.11967e-05	0.251365	0.373	0.348	0.271991	4	UBE2D1
1.22949e-05	0.323684	0.271	0.228	0.298668	4	TET2
2.06596e-05	0.2503	0.319	0.283	0.501863	4	SLC44A2
2.06649e-05	0.288616	0.283	0.245	0.501993	4	MKNK1
3.80681e-05	0.292941	0.296	0.265	0.924751	4	ARHGAP30
4.33295e-05	0.299763	0.316	0.285	1	4	ARHGAP26
5.79342e-05	0.283952	0.265	0.226	1	4	KAT6A
9.52974e-05	0.255121	0.265	0.226	1	4	PRKCB
0.000100425	0.266812	0.294	0.265	1	4	ATG16L2
0.000129377	0.275015	0.315	0.288	1	4	PTK2B
0.000213861	0.25125	0.373	0.35	1	4	CREBRF
0.00113758	0.274034	0.287	0.272	1	4	NFAM1
0.00231064	0.250003	0.266	0.25	1	4	SHKBP1
1.2005e-243	1.47102	0.529	0.075	2.91625e-239	5	HLA-DPA1
2.0059e-239	1.8152	0.504	0.072	4.87274e-235	5	C1QB
6.82594e-230	1.82362	0.504	0.075	1.65816e-225	5	APOC1
8.79834e-227	1.61111	0.436	0.054	2.13729e-222	5	C1QC
6.11649e-206	1.49896	0.506	0.083	1.48582e-201	5	ANXA2
1.61352e-192	1.5524	0.413	0.058	3.91957e-188	5	APOE
7.23172e-187	1.5096	0.975	0.67	1.75673e-182	5	MT-CO1
2.74757e-186	1.42925	0.315	0.032	6.67441e-182	5	C1QA
1.80918e-185	1.35773	0.454	0.072	4.39487e-181	5	HLA-DPB1
1.90705e-161	1.8995	0.407	0.067	4.6326e-157	5	CCL18
1.86747e-150	1.17736	0.322	0.042	4.53646e-146	5	GPNMB
3.44235e-145	1.77471	0.786	0.348	8.36216e-141	5	CTSB
7.27464e-134	1.25857	0.579	0.159	1.76716e-129	5	HLA-DRB1
2.07698e-130	1.03727	0.27	0.034	5.04539e-126	5	LGALS1
1.2454e-127	1.01424	0.259	0.032	3.02534e-123	5	ACP5
3.37741e-126	1.24274	0.251	0.03	8.2044e-122	5	FBP1
8.65333e-123	1.17561	0.508	0.127	2.10207e-118	5	PPIA
2.70812e-121	1.13523	0.79	0.346	6.57857e-117	5	EEF1A1
1.04329e-119	1.06773	0.429	0.092	2.53437e-115	5	RPS12
2.98939e-119	1.1982	0.517	0.136	7.26184e-115	5	RPS8
2.35798e-114	0.923037	0.276	0.04	5.728e-110	5	VAMP8
3.56013e-114	1.14827	0.548	0.16	8.64827e-110	5	RPL37A
1.87225e-107	0.957666	0.286	0.046	4.54807e-103	5	CD81
2.17473e-102	0.909599	0.27	0.043	5.28284e-98	5	PLD3
2.20805e-102	0.848813	0.82	0.362	5.3638e-98	5	HLA-DRA
2.73273e-97	1.04894	0.469	0.129	6.63835e-93	5	CST3
8.0815e-97	0.814997	0.981	0.839	1.96316e-92	5	MT-ND3
1.78292e-93	0.853811	0.967	0.786	4.33107e-89	5	MT-CO3
1.28439e-92	0.797498	0.981	0.816	3.12004e-88	5	MT-CO2
2.67738e-91	0.949558	0.346	0.076	6.50389e-87	5	CALR
1.62267e-87	0.949588	0.394	0.1	3.9418e-83	5	CAPG
9.19093e-82	0.732949	0.398	0.103	2.23266e-77	5	LGALS3
3.42013e-81	0.950063	0.705	0.331	8.30819e-77	5	RPS29
4.9635e-80	0.724394	0.932	0.62	1.20573e-75	5	CD74
7.47006e-80	0.942949	0.533	0.189	1.81463e-75	5	RPL31
1.05005e-79	0.924626	0.38	0.1	2.55079e-75	5	RPS20
5.33141e-78	1.22243	0.286	0.062	1.29511e-73	5	CTSL
2.47249e-75	1.08993	0.604	0.255	6.00618e-71	5	CSTB
2.53272e-75	0.929309	0.519	0.186	6.15247e-71	5	RPLP1
1.50026e-73	0.76885	0.251	0.049	3.64443e-69	5	RPS23
2.8062e-73	0.776816	0.266	0.055	6.81683e-69	5	RPL5
2.54011e-71	0.680696	0.94	0.741	6.17044e-67	5	MT-ATP6
1.02639e-70	0.892609	0.33	0.086	2.4933e-66	5	RPS18
1.93758e-69	0.873727	0.51	0.189	4.70676e-65	5	RPS24
1.30694e-67	0.803547	0.257	0.056	3.17483e-63	5	RPS4X
2.69308e-63	0.842343	0.432	0.144	6.54203e-59	5	RPS19
9.55592e-63	0.846261	0.579	0.254	2.32132e-58	5	TMSB10
2.38446e-62	0.790592	0.622	0.279	5.79234e-58	5	RPL23
2.4095e-62	0.764574	0.278	0.068	5.85315e-58	5	RPS17
1.14003e-60	0.809064	0.29	0.076	2.76936e-56	5	RPL13
6.55696e-58	0.813064	0.581	0.262	1.59282e-53	5	RPL27A
9.04052e-57	0.849711	0.533	0.231	2.19612e-52	5	RPS6
1.28855e-54	0.83292	0.409	0.149	3.13014e-50	5	RPS13
1.01957e-53	0.731139	0.295	0.083	2.47675e-49	5	RPL29
2.89598e-53	0.733575	0.336	0.104	7.03492e-49	5	RPS15A
3.11366e-53	0.772051	0.66	0.346	7.56369e-49	5	RPL34
5.80972e-53	0.771678	0.392	0.137	1.4113e-48	5	RPL27
8.05361e-53	0.700408	0.581	0.265	1.95638e-48	5	PTMA
2.52233e-52	0.798824	0.32	0.098	6.12725e-48	5	YBX1
5.25101e-51	0.590158	0.994	0.976	1.27557e-46	5	FTL
1.95848e-50	0.659273	0.268	0.073	4.75753e-46	5	RPL6
5.51469e-50	0.802939	0.691	0.373	1.33963e-45	5	LYZ
9.74085e-50	0.784885	0.571	0.278	2.36625e-45	5	RPL37
1.67515e-49	0.505377	0.981	0.889	4.06927e-45	5	MT-ND4
4.36843e-49	0.722244	0.483	0.199	1.06118e-44	5	RPL38
3.17507e-48	0.704184	0.349	0.116	7.71289e-44	5	RPL12
5.3625e-47	0.667145	0.309	0.097	1.30266e-42	5	RPS21
2.51937e-46	0.713653	0.575	0.285	6.12005e-42	5	CTSD
3.89287e-46	0.510019	0.952	0.815	9.45655e-42	5	MT-CYB
3.99817e-44	0.729887	0.446	0.187	9.71236e-40	5	RPL32
4.76843e-44	0.633478	0.322	0.106	1.15835e-39	5	RPL11
2.02938e-43	0.516455	0.952	0.799	4.92978e-39	5	MT-ND2
3.45179e-42	0.691192	0.259	0.078	8.38508e-38	5	RPS5
5.1971e-42	0.644267	0.394	0.155	1.26248e-37	5	RPL13A
9.03503e-41	0.668757	0.324	0.115	2.19479e-36	5	RPS14
9.92919e-41	0.635444	0.44	0.188	2.412e-36	5	RPL9
1.67022e-40	0.56987	0.907	0.796	4.05731e-36	5	PSAP
6.52232e-40	0.792781	0.301	0.105	1.5844e-35	5	HLA-DQA1
2.89163e-39	0.657643	0.346	0.131	7.02435e-35	5	RPS28
7.52808e-37	1.41382	0.297	0.109	1.82872e-32	5	SPP1
8.89442e-37	0.665698	0.444	0.202	2.16063e-32	5	RPL21
4.51051e-36	0.622219	0.322	0.119	1.09569e-31	5	RPLP2
5.36441e-36	0.632272	0.376	0.153	1.30312e-31	5	ANXA5
1.43147e-35	0.604034	0.33	0.126	3.47733e-31	5	RPS27
3.16064e-33	0.506023	0.72	0.441	7.67784e-29	5	VIM
2.15861e-32	0.618201	0.523	0.279	5.24371e-28	5	NPC2
6.27339e-32	0.641916	0.444	0.219	1.52393e-27	5	RPL39
2.06736e-31	0.379437	0.278	0.105	5.02204e-27	5	MT2A
8.52808e-31	0.579596	0.378	0.167	2.07164e-26	5	RPL35A
2.18426e-29	0.487069	0.286	0.108	5.306e-25	5	GSTO1
1.06458e-28	0.575591	0.317	0.132	2.58607e-24	5	RPL19
6.1697e-28	0.516901	0.757	0.554	1.49874e-23	5	MT-ND5
8.52502e-28	0.567163	0.272	0.106	2.0709e-23	5	ATP5MC2
1.38383e-27	0.559535	0.432	0.221	3.36159e-23	5	MTATP6P1
1.40636e-27	0.549697	0.322	0.137	3.41633e-23	5	RPS3
4.00918e-27	0.51212	0.577	0.341	9.7391e-23	5	RPS27A
1.03832e-25	0.486937	0.51	0.284	2.52229e-21	5	RPS16
1.63618e-24	0.393571	0.915	0.808	3.97462e-20	5	MT-ND1
4.7456e-24	0.471413	0.272	0.113	1.1528e-19	5	COX4I1
4.98451e-24	0.529206	0.492	0.283	1.21084e-19	5	SERF2
1.39333e-23	0.499127	0.602	0.388	3.38469e-19	5	CD63
2.51057e-23	0.505667	0.558	0.344	6.09868e-19	5	RPL30
7.72711e-21	0.251732	0.996	0.981	1.87707e-16	5	TMSB4X
1.29407e-20	0.475397	0.259	0.113	3.14356e-16	5	RPS2
1.57404e-20	0.478027	0.266	0.117	3.82365e-16	5	RPL8
8.78585e-20	0.385828	0.793	0.617	2.13426e-15	5	ATP5F1E
1.65281e-19	0.503071	0.332	0.17	4.01501e-15	5	TUBA1B
3.09997e-19	0.487278	0.363	0.194	7.53046e-15	5	CTSC
2.69054e-18	0.46185	0.32	0.164	6.53585e-14	5	PKM
1.67972e-17	0.348144	0.257	0.118	4.08038e-13	5	HLA-DQB1
4.89274e-17	0.379714	0.506	0.315	1.18854e-12	5	CALM1
1.93048e-16	0.429679	0.456	0.284	4.68951e-12	5	MT-ATP8
4.94599e-16	0.420256	0.276	0.136	1.20148e-11	5	RPS26
1.04132e-15	0.399661	0.282	0.142	2.52956e-11	5	RPL41
1.81787e-15	0.38052	0.515	0.34	4.41596e-11	5	MT-ND4L
2.2634e-13	0.336256	0.371	0.22	5.49825e-09	5	RPS11
2.28823e-12	0.368609	0.301	0.174	5.55858e-08	5	SRP14
2.54107e-11	0.328651	0.303	0.174	6.17277e-07	5	NDUFA1
3.03595e-11	0.349201	0.263	0.147	7.37493e-07	5	CREG1
3.7325e-11	0.350527	0.413	0.269	9.06698e-07	5	RPL28
7.386e-11	0.254911	0.793	0.652	1.79421e-06	5	SH3BGRL3
1.22105e-10	0.303806	0.44	0.291	2.96618e-06	5	GAPDH
1.37827e-10	0.286508	0.575	0.417	3.3481e-06	5	GNAS
1.4656e-10	0.261674	0.286	0.165	3.56024e-06	5	JUN
9.3186e-10	0.290913	0.324	0.203	2.26367e-05	5	H2AFY
1.06045e-09	0.293182	0.255	0.146	2.57605e-05	5	YWHAE
1.09503e-09	0.267932	0.307	0.188	2.66006e-05	5	HSPA5
1.83825e-09	0.304968	0.288	0.175	4.46549e-05	5	CHCHD2
2.71712e-08	0.303045	0.255	0.156	0.000660044	5	LDHA
5.29258e-08	0.358386	0.301	0.202	0.00128567	5	GSN
7.5228e-08	0.272899	0.454	0.322	0.00182744	5	MTND1P23
1.35399e-06	0.256249	0.295	0.202	0.0328912	5	HMGN2

## Sheet: 2.N1-N2 signature
N1	N2		Reference
CD101	KIT		Jaillon S, Ponzetta A, Di Mitri D, et al. Neutrophil diversity and plasticity in tumour progression and therapy. Nat Rev Cancer. 2020;20(9):485-503. doi: 10.1038/s41568-020-0281-y. Epub 2020 Jul 21. PMID: 32694624.
CD177	CD274		Keeley T, Costanzo-Garvey DL, Cook LM. Unmasking the Many Faces of Tumor-Associated Neutrophils and Macrophages: Considerations for Targeting Innate Immune Cells in Cancer. Trends Cancer. 2019;5(12):789-798. doi: 10.1016/j.trecan.2019.10.013. Epub 2019 Nov 20. PMID: 31813456.
ICAM1	SIGLEC5
HLA-DRA	OLR1
HLA-DRB1	CD84
HLA-DPA1	JAML
HLA-DPB1	ARG1
HLA-DQA1	ARG2
HLA-DQB1	TGFB1
CD86	CCL17
FUT4	CXCL14
CXCL9	EGF
CXCL10	HGF
CXCL13	PTGFA
CCL6	PTGFB
TNF	PROK2
TNFSF9	MMP9
TNFSF4	VEGFA
STING1	ELANE
IFNG	HMGB1
	CYBB
	MPO
	PAID4
	NOS2
	DDIT3
	HSPA5
	ATF4
	CD36
	FATP2
	PTGS2
	HIF1A
	VSIR
	S100A8
	S100A9
	OSM
